# Supplementary material for: Proteomic Analysis Reveals Dynamic Regulation of Fruit Ripening in Response to Exogenous Ethylene in Kiwifruit Cultivars
Source: Preprints.org preprint supplement (doi:10.20944/preprints201712.0200.v1), 2017-12-29
Supplement: Supplementary file 2 [file Supplementary Table 1.xlsx]

## Sheet: Sheet1
Supplementary Table 1. Comparative analysis of 'Hayward' kiwifruit using progenesis Samespot TotalLab
(New Castle, Uk) under 0 days (control), 3 and 6 days ethylene treatment
Condition	Condition 1	Condition 2	Condition 3
Replicates	3	3	3
Spot No.	Fold Change	Average Normalised Volumes
		Control	Ethylene (3 days)	Ethylene (6 days)
1	1.4	1627.75	2242.6	2270.49
2	1.2	17530	20270	20020
3	2.5	13760	17370	34430
4	1.6	237.444	366.971	391.229
5	1.4	81430	75580	108800
6	1.9	13810	14150	25770
7	3.8	629.111	831.802	217.998
8	2.1	16520	17370	35290
9	2.1	1402.52	2110.76	1004.35
10	2.1	10960	23480	20210
11	1.7	55100	58040	94710
12	1.5	1652.94	2287.45	1541.56
13	5.6	435.949	320.76	1807.24
14	1.4	3676.18	4987.41	5010.06
15	15.6	2855.43	182.806	252.06
16	1.7	19940	18930	32970
17	4	3199.76	800.541	1180.5
18	12.6	289.36	424.056	3644.66
19	1.9	13640	17560	25610
20	3.1	303.103	686.372	936.224
21	4.2	644.38	2680.93	1142.54
22	2.8	1398.7	1486.91	530.397
23	2.3	8715.93	11590	19900
24	2.5	35560	30920	77410
25	20.7	761.194	36.697	102.187
26	6.6	6914.87	10630	45680
27	1.5	1849.92	2681.61	2824.24
28	1.6	1015.43	651.034	705.574
29	2.6	8189.89	9811.05	21670
30	1.7	2237.01	2367.64	3782.85
31	1.8	1325.41	1427.79	806.788
32	2.1	5495.56	3865.43	8266.41
33	1.4	777.227	1126.74	1015.05
34	2	6706.44	6723.73	13590
35	1.9	2167.53	1559.63	1129.89
36	2.8	850.521	1164.12	412.639
37	2.6	2582.1	2036.69	994.616
38	25	535.202	163.098	21.411
39	1.7	13950	10770	18740
40	17.8	540.547	36.697	654.968
41	4.2	905.492	1427.11	340.622
42	1.9	574.903	636.084	1077.34
43	4.7	3953.32	3519.53	16640
44	5.4	6557.56	7378.16	1355.68
45	3.2	2867.65	3206.24	1011.16
46	2.4	2924.14	2773.35	1240.84
47	5.5	2488.19	3155.95	13730
48	3.6	5489.45	5119.25	1508.47
49	1.9	8932	7264.67	13740
50	9.8	15340	20320	149800
51	1.4	924.579	1125.38	1329.4
52	1.3	1594.15	1713.89	2046.65
53	9.6	2834.05	3334	27110
54	1.3	165300	163900	208600
55	1.5	794.787	1165.47	973.206
56	6.3	925.343	2112.12	5787.65
57	3.5	672.629	707.439	199.507
58	10.5	513.061	68.637	48.66
59	2.1	4390.03	4749.56	2232.53
60	1.2	1178.06	1081.89	1316.75
61	25.3	887.932	42.134	35.035
62	2.1	7867.7	6055.71	12950
63	3.1	3024.92	2526.67	7840.15
64	2.3	1543	2349.98	3502.57
65	2.9	9208.38	14390	4894.25
66	2.4	2617.99	3802.91	6387.15
67	2.5	1546.06	2528.03	3911.31
68	1.4	2082.02	2965.67	2361
69	1.6	11920	7894.64	12740
70	5.6	859.683	2250.08	401.934
71	8.2	1267.38	664.626	154.74
72	2.6	758.903	778.115	294.881
73	13.6	592.464	8033.27	1233.05
74	3.7	3053.17	3588.84	971.259
75	2.2	1611.71	2813.45	3528.84
76	1	757.376	766.562	731.851
77	1.6	3741.84	3422.35	5349.71
78	14.6	3673.89	251.443	341.595
79	12.4	2969.95	2451.91	240.382
80	3.6	2966.14	1310.9	835.011
81	6.4	1598.73	878.693	251.087
82	3.4	9319.85	7492.33	25770
83	2.6	3705.95	1675.16	4416.41
84	3.4	8293.73	5232.06	18050
85	13.6	403.12	735.981	5483.04
86	3.1	607.733	1680.59	1900.67
87	2.9	245.078	459.394	718.226
88	1.5	8802.97	11240	13510
89	1.9	511.534	697.925	954.715
90	1.5	15010	18550	12600
