# Supplementary material for: Proteomic Analysis Reveals Dynamic Regulation of Fruit Ripening in Response to Exogenous Ethylene in Kiwifruit Cultivars
Source: Preprints.org preprint supplement (doi:10.20944/preprints201712.0200.v1), 2017-12-29
Supplement: Supplementary file 3 [file Supplementary Table 2.xlsx]

## Sheet: Sheet1
Supplementary Table 2. Comparative analysis of 'Gamrok' kiwifruit using progenesis Samespot TotalLab
(New Castle, Uk) under 0 days (control), 3 and 6 days ethylene treatment
Condition	Condition 1	Condition 2	Condition 3
Replicates	3	3	3
Spot No.	Fold Change	Average Normalised Volumes
		Control	Ethylene (3 days)	Ethylene (6 days)
1	3.1	2252.6	726.177	971.5
2	4.5	6871.44	1530.47	1673.82
3	1.8	117000	214400	117200
4	2	69890	114200	57290
5	24.6	3110.4	667.586	126.244
6	7.5	215.204	1606.82	398.322
7	7.1	4770.69	19550	2762.14
8	8.1	5315.74	42820	18140
9	2.3	52390	22900	40520
10	12.3	230.288	1257.05	2828.16
11	3.8	2648.82	6356.27	1652.06
12	1.7	42370	71200	49220
13	2	85.478	173.998	165.423
14	3.9	1329.44	5216.4	2442.9
15	6.7	2371.26	3970	594.219
16	5.3	30010	159900	73740
17	2.5	6138.34	3311.3	2412.43
18	5.8	1165.52	6107.7	6779.46
19	1.6	787.405	495.363	650.811
20	2.4	781.371	1846.51	859.767
21	2.6	638.572	1322.74	1662.94
22	2.3	57820	72420	31390
23	3.2	8577.99	12060	3754.68
24	6.1	350.963	1006.71	165.423
25	6	332.862	1846.51	306.179
26	16	3959.15	41610	2605.42
27	9.9	1522.52	15110	1992.34
28	7.4	1140.38	8474.43	1409
29	4.1	2273.72	9305.36	2923.93
30	6.2	1532.57	1127.44	7002.2
31	5.2	906.069	587.688	3081.38
32	1.6	3112.41	4944.75	3256.23
33	2.3	164.923	385.282	182.836
34	2.3	2237.52	3087.58	1356.76
35	1.2	1619.06	1576.64	1351.68
36	6.9	5957.33	862.89	2915.23
37	1.4	1620.06	1729.33	2200.57
38	1.8	2832.85	1564.21	2133.82
39	1.7	1560.73	1947.72	2672.89
40	2.3	275100	532400	235400
41	2	4771.69	9612.52	4831.38
42	1	1629.11	1569.54	1590.39
43	1.5	22160	14910	20050
44	5	14430	72840	15430
45	4.6	7399.39	33950	8439.5
46	3.3	10170	3089.36	3344.02
47	4.3	5213.16	20790	4890.15
48	1	60590	61560	60360
49	3.3	2812.74	845.135	890.965
50	3.7	17680	65550	26070
51	2.3	25080	52810	23300
52	2.1	1369.66	1750.64	836.549
53	3.2	844.726	1750.64	2686.68
54	2.3	7849.91	3577.62	3378.12
55	1.9	1653.25	891.298	1578.05
56	6.8	3172.75	21620	4723.27
57	4.6	179.001	241.467	52.239
58	3.1	9323.16	28450	15450
59	1.8	9615.79	15410	17220
60	5.8	217.215	1251.72	1176.1
61	1.8	3755.01	4857.75	2736.02
62	1.8	671.758	1193.13	827.843
63	20.2	1097.14	16450	816.234
64	5.2	1549.67	2528.3	8107.2
65	3.2	410.295	658.708	1311.05
66	3.6	586.28	427.894	163.247
67	3.9	583.263	408.363	1611.43
68	1.2	2317.97	2008.08	2501.67
69	2.2	917.131	1633.45	2054.01
70	2.9	1194.68	484.71	416.461
71	4.4	116.653	324.915	515.134
72	5	1745.77	525.546	351.162
73	3.5	375.098	351.548	108.106
74	2	442.475	797.197	396.871
75	6	679.803	351.548	2095.36
76	7.9	194.086	189.978	1492.44
77	13.2	248.39	298.283	3276.55
78	2.2	945.288	1473.66	2047.48
79	1.6	2291.82	3275.78	3568.21
80	1.4	3795.23	5447.21	3982.5
81	1.2	897.018	988.95	1102.82
82	1.5	9416.68	13920	10490
83	1.6	8690.62	5587.48	7081.28
84	3.6	2214.39	7899.17	3754.68
85	6.1	3131.52	5141.83	840.903
86	3.4	1307.31	1773.72	521.664
87	2.2	396.217	323.14	700.873
88	6.9	10470	1521.6	3111.85
89	3.8	830.647	493.587	1890.76
90	2.2	1164.52	1237.52	2519.08
91	1.7	2714.18	2205.16	3797.48
92	3.9	10480	4271.84	16460
93	4.2	784.388	188.202	763.27
94	1.6	497.785	308.936	362.771
95	3.4	1516.48	450.975	594.219
96	2.9	1687.44	4845.32	3418.03
97	5.9	18760	3590.05	21310
98	3.6	4039.6	5821.84	14480
99	4.4	219.226	974.746	486.113
100	1.4	10010	12380	13810
101	1.9	7520.07	6365.14	11830
102	4.4	5885.93	2977.5	13020
103	2.9	14650	6491.2	19030
104	1.6	4236.7	2617.08	4271.99
105	3.8	1096.13	2256.65	587.689
106	2.2	2062.54	4440.51	4052.15
