# Supplementary material for: Proteomic Analysis Reveals Dynamic Regulation of Fruit Ripening in Response to Exogenous Ethylene in Kiwifruit Cultivars
Source: Preprints.org preprint supplement (doi:10.20944/preprints201712.0200.v1), 2017-12-29
Supplement: Supplementary file 4 [file Supplementary Table 3.xlsx]

## Sheet: Sheet1
Supplementary Table 3. MS-MS ion search in 'Hayward' kiwifruit cultivar
under 0 day (control), 3 and 6 day ethylene treatment
Taxonomy: Kiwifruit
Type of search : MS/MS Ion Search	MS-MS ion search
Enzyme : Trypsin	Trypsin
Mass values : Monoisotopic	Monoisotopic
Protein Mass : Unrestricted	Unrestricted
Instrument type : ESI-QUAD-TOF	MALDI-TOF MS
		Peptide
Spot No.	Protein Name	K.STLTDSLVAAAGIIAQEVAGDVR.M
1	Elongation factor elongation factor 2-like	M.YLTASSSASSSIIRAASSR.S
2	Aconitate hydratase 2, mitochondrial	R.NMSVIAHVDHGK.S
3	Elongation factor elongation factor 2-like	K.KPPGTVFFGQRLNK.A
4	chloroplast heat shock protein 70-2	K.LGTVIGIDLGTTYSCVGVYK.N
5	heat shock protein 70	M.FSQNICMWRDCFAR.C
6	Putative defensin-like protein	K.VYQGEMDGGTVK.V
7	Pto-like protein kinase	R.SEGDLMLNGAFFTASGAGAAASYARASSLGAK.S
8	Pectate lyase	.MEFRGHDEPVDEMGVAYGR.T
9	Zinc-finger homeodomain protein 6	.MADSLTDDQIAEFK.E
10	Calmodulin	-.MATEDREMMEGR.G
11	Transmembrane protein 247	K.EETAEQNR.Y
12	hypothetical protein	K.LTNNDFSEGGDGGGPSECDESYHSNNER.I
13	Kiwellin	K.EICPNGGAALLCQPGDR.L
14	Aspartate 1-decarboxylase	R.EAFPGDVFYLHSR.L
15	ATP synthase subunit alpha	M.YYMTHK.E
16	NADPH:quinone reductase	R.LDLAGRDLTDALMK.I
17	Actin	K.LTYYTPDYETK.D
18	Ribulose bisphosphate carboxylase large chain	-.MSYSVVEYDSGPAGMPGMGALINEWAAK.G
19	Uncharacterized protein	R.FLEKQGIHASSSSQEPR.Y
20	Haloacid dehalogenase-like hydrolase superfamily protein	K.YQEIVNIR.L
21	Uncharacterized protein	R.SAGAVVDIK.S
24	Actinidain	K.AMYESWLIK.Y
28	Actinidain	M.PTIKQLITITPK.K
30	Ribosomal protein S12	R.AVFPSIVGRPR.H
32	ACT1	R.LVNMLVNGILKHGK.K
33	30S ribosomal protein S7	K.AHPSTSSSSSSSR.W
34	Zinc finger AN1 and C2H2 domain-containing stress-associated protein 11	K.KYFTVEK.I
35	GWD1	K.EAFSLFDK.D
36	Calmodulin	R.GLEPVLVDGKDVMPDVR.A
37	Phosphoglucose isomerase	R.LVNMLVNGILKHGK.K
38	30S ribosomal protein S7, chloroplastic	K.TVDGPSMK.D
41	Glyceraldehyde 3-phosphate dehydrogenase	K.DTDILAAFR.V
42	Ribulose bisphosphate carboxylase large chain	K.DTDILAAFR.V
43	Ribulose bisphosphate carboxylase large chain	K.TFPTLDPR.T
44	Putative mitochondrial aldehyde dehydrogenase	-.MGFAAAGGGK.G
45	Predicted protein	K.TGSASHSR.T
46	Pto-like protein kinase	K.TVDGPSMK.D
47	Glyceraldehyde 3-phosphate dehydrogenase	R.RFLHAVYR.V
48	Lactoylglutathione lyase	R.FLHAVYR.V
49	Lactoylglutathione lyase	K.IWHHTFYNELR.V
50	Actin	K.DPEHAHRHK.I
51	Ethylene receptor	K.VSNRYEPR.V
52	Actinidain	K.IVTGNLISLSEQELVDCGR.T
54	actinidin	K.TDSSDVNRASLLYGR.M
55	Mitochondrial distribution and morphology protein	R.TVGAVVGVK.D
56	actinidin Act2d	R.TVGAVVGVK.N
57	30S ribosomal protein S7, chloroplastic	R.DLNDCDGQLICIEGK.C
58	Kiwellin	K.CNDDPEVGTHICR.G
59	Kiwellin	R.DLNDCDGQLICIEGK.C
60	Kiwellin	K.VVDECDSR.H
61	Kiwellin	R.SISAHVGNDYRR.V
62	Peptidyl-tRNA hydrolase OS=Rhodopseudomonas palustris	K.LTNNDFSEGGDGGGPSECDESYHSNNER.I
63	Kiwellin	K.LTNNDFSEGGDGGGPSECDESYHSNNER.I
64	Kiwellin	-.ISSCNGPCR.D
65	Kiwellin	K.NSWDTTWGEEGYMR.I
66	Actinidain	K.NSWDTTWGEEGYMR.I
67	Actinidain	K.NSWDTTWGEEGYMR.I
68	actinidain (EC 3.4.22.14) precursor (clone pAC.7)	K.NSWDTTWGEEGYMR.I
70	actinidain (EC 3.4.22.14) precursor (clone pAC.7)	R.TSHYCTGKSCDCPVYQG.-
71	Disintegrin viperistatin	R.ILYEMGGVAENIAR.K
72	50S ribosomal protein L16, chloroplastic	K.LTNNDFSEGGDGGGPSECDESYHSNNER.I
73	Kiwellin	K.LTNNDFSEGGDGGGPSECDESYHSNNER.I
74	Kiwellin	K.LTNNDFSEGGDGGGPSECDESYHSNNER.I
75	Kiwellin	K.LTNNDFSEGGDGGGPSECDESYHSNNER.I
76	Kiwellin	R.LLLWFLSLSPGVCNINLIIESLMK.I
77	Pentatricopeptide repeat-containing protein At5g50990	R.TVGAVVGVK.N
78	Ankyrin repeat domain-containing protein 63	K.VYKAVIDGGETNVAIK.R
79	Pto-like protein kinase	-.YMVIQGEPGAVIR.L
80	Profilin	K.GPGGVTVKK.T
81	minor allergen hazelnut profilin	K.SHPTYDCSPPVTSSTPAK.L
82	kiwellin	R.GQNWIINPGAGTK.G
83	Thaumatin-like protein	R.CFVGGLAWATDDR.A
84	Glycine-rich RNA-binding protein	R.CFVGGLAWATDDR.A
85	putative glycine-rich RNA-binding protein	R.IVALSTGWYNGGSR.C
86	Kiwellin	K.CGTSCPCVNCTCD.-
87	Metallothionein-like protein type 3	R.CPDAYSYPKDDQTSTFTCPGGTNYK.V
88	thaumatin-like protein	K.LTNNDFSEGGDGGGPSECDESYHSNNER.I
89	kiwellin	K.LTNNDFSEGGDGGGPSECDESYHSNNER.I
90	kiwellin
