# Supplementary material for: Proteomic Analysis Reveals Dynamic Regulation of Fruit Ripening in Response to Exogenous Ethylene in Kiwifruit Cultivars
Source: Preprints.org preprint supplement (doi:10.20944/preprints201712.0200.v1), 2017-12-29
Supplement: Supplementary file 5 [file Supplementary Table 4.xlsx]

## Sheet: Sheet1
Supplementary Table 4. MS-MS ion search in 'Gamrok' kiwifruit cultivar
under 0 day (control), 3 and 6 day ethylene treatment
Taxonomy: Kiwifruit
Type of search : MS/MS Ion Search	MS-MS ion search
Enzyme : Trypsin	Trypsin
Mass values : Monoisotopic	Monoisotopic
Protein Mass : Unrestricted	Unrestricted
Instrument type : ESI-QUAD-TOF	MALDI-TOF MS
Spot No.	Protein Name	Peptide
1	Elongation factor elongation factor 2-like	K.STLTDSLVAAAGIIAQEVAGDVR.M
2	Aconitate hydratase 2, mitochondrial	M.YLTASSSASSSIIRAASSR.S
3	Elongation factor elongation factor 2-like	R.NMSVIAHVDHGK.S
4	Chain A, Crystal Structure Of Actinidin	K.KPPGTVFFGQRLNK.A
5	actinidin Act2b	K.LGTVIGIDLGTTYSCVGVYK.N
6	actinidin Act2b	M.FSQNICMWRDCFAR.C
7	NAD(P)H-quinone oxidoreductase subunit K, chloroplastic	K.VYQGEMDGGTVK.V
8	chloroplast heat shock protein 70-2	R.SEGDLMLNGAFFTASGAGAAASYARASSLGAK.S
9	Kiwellin	.MEFRGHDEPVDEMGVAYGR.T
10	actinidin Act2d	.MADSLTDDQIAEFK.E
11	actinidin Act2b	-.MATEDREMMEGR.G
12	heat shock protein 70	K.EETAEQNR.Y
13	kiwellin	K.LTNNDFSEGGDGGGPSECDESYHSNNER.I
17	Photosystem I iron-sulfur center	R.ACPTDVLEMIPWDGCK.A
21	Actinidain	K.ENLRIIDDHNADANR.S
22	Actinidin	K.ENLRIIDDHNADANR.S
23	Actinidin Act2a	R.TVGAVVGVK.N
24	Kiwellin	R.DLNDCDGQLICIEGK.C
25	Actinidin Act2a	R.TVGAVVGVK.N
26	Actinidin Act2a	R.TVGAVVGVK.N
27	Kiwellin	R.DLNDCDGQLICIEGK.C
28	Kiwellin	R.DLNDCDGQLICIEGK.C
29	Kiwellin	R.GKSHPTYDCSPPVTSSTPAK.L
30	Actinidain	-.GPQQQHR.L
31	Uncharacterized protein	-.MSYSVVEYDSGPAGMPGMGALINEWAAK.G
32	Actinidain	K.SFVSMSLL.-
33	Actinidain	K.SFVSMSLL.-
36	hypothetical protein	K.EETAEQNR.Y
38	Kiwellin	K.LTNNDFSEGGDGGGPSECDESYHSNNER.I
39	Aspartate 1-decarboxylase	-
40	GDP-L-galactose phosphorylase	-
41	Actinidain	K.SFVSMSLL.-
42	Actinidain	K.SFVSMSLL.-
43	Kiwellin	K.LTNNDFSEGGDGGGPSECDESYHSNNER.I
44	Calmodulin	K.EAFSLFDK.D
45	ACC oxidase	-
46	Kiwellin	K.LTNNDFSEGGDGGGPSECDESYHSNNER.I
47	Non-specific lipid-transfer protein	-
48	30S ribosomal protein S19, chloroplastic	K.LTYYTPDYETK.D
49	Lipoxygenase	-
50	Actinidain	K.SFVSMSLL.-
51	Putative mitochondrial type II NAD(P)H dehydrogenase	K.TFPTLDPR.T
52	Kiwellin	K.LTNNDFSEGGDGGGPSECDESYHSNNER.I
53	Actinidain	K.SFVSMSLL.-
54	GDP-L-galactose phosphorylase	-
55	Actinidain	K.SFVSMSLL.-
56	Actinidain	K.SFVSMSLL.-
57	Metallothionein-like protein type 3	K.CGTSCPCVNCTCD.-
58	Photosystem I iron-sulfur center	R.ACPTDVLEMIPWDGCKAK.Q
59	Photosystem II reaction center protein L	.MTQSNPNEQSVELNR.T
60	Ethylene response factor 7	R.VWLGTFDTAEEAARAYDAAAR.D
61	30S ribosomal protein S7, chloroplastic	R.LVNMLVNGILKHGK.K
62	Photosystem I reaction center subunit	K.SKANLELNDK.K
66	Cytochrome f	R.KTFSWIK.E
67	Actinidain	K.SFVSMSLL.-
68	Actinidin	K.SFVSMSLL.-
70	50S ribosomal protein L36, chloroplastic	R.IIVICSNPRHK.Q
71	50S ribosomal protein L36	R.IIVICSNPRHK.Q
72	actinidin Act2d	R.TVGAVVGVK.D
73	30S ribosomal protein S7, chloroplastic	R.IIVICSNPRHK.Q
74	Kiwellin	K.LTNNDFSEGGDGGGPSECDESYHSNNER.I
75	50S ribosomal protein L36, chloroplastic	R.IIVICSNPRHK.Q
76	Kiwellin	K.LTNNDFSEGGDGGGPSECDESYHSNNER.I
77	Kiwellin	K.LTNNDFSEGGDGGGPSECDESYHSNNER.I
78	50S ribosomal protein L36, chloroplastic	R.IIVICSNPRHK.Q
79	Kiwellin	K.LTNNDFSEGGDGGGPSECDESYHSNNER.I
80	Kiwellin	K.LTNNDFSEGGDGGGPSECDESYHSNNER.I
81	Actinidain	R.TVGAVVGVK.D
82	actinidain (EC 3.4.22.14) precursor (clone pAC.7)	K.NSWDTTWGEEGYMR.I
83	Kiwellin	K.LTNNDFSEGGDGGGPSECDESYHSNNER.I
84	actinidain (EC 3.4.22.14) precursor (clone pAC.7)	K.NSWDTTWGEEGYMR.I
85	Ankyrin repeat domain-containing protein 63	-
86	Kiwellin	K.LTNNDFSEGGDGGGPSECDESYHSNNER.I
87	GA signaling F-Box	K.HADARTLAAAACVSK.Q
88	kiwellin	K.LTNNDFSEGGDGGGPSECDESYHSNNER.I
89	Kiwellin	K.LTNNDFSEGGDGGGPSECDESYHSNNER.I
92	Kiwellin	K.LTNNDFSEGGDGGGPSECDESYHSNNER.I
95	Pto-like protein kinase	K.VYQGEMDGGTVK.V
96	Profilin	-.YMVIQGEPGAVIR.L
97	minor allergen hazelnut profilin	K.GPGGVTVKK.T
98	putative glycine-rich RNA-binding protein	R.CFVGGLAWATDDR.A
99	Metallothionein-like protein type 3	K.CGTSCPCVNCTCD.-
100	Ethylene receptor ERS1b	M.ESCDCIETQWPADELLVK.Y
101	GDP-L-galactose phosphorylase	K.DEAEDGARSGGGCGR.N
102	50S ribosomal protein L36, chloroplastic	R.IIVICSNPRHK.Q
103	50S ribosomal protein L36, chloroplastic	R.IIVICSNPRHK.Q
104	50S ribosomal protein L36, chloroplastic	R.IIVICSNPRHK.Q
